# Supplementary material for: Child Linear Growth During and After the First 1000 Days Is Positively Associated with Intellectual Functioning and Mental Health in School-Age Children in Vietnam
Source: PubMed Central journal article supplement (PMC8417934; doi:10.1093/jn/nxab182), 2021-06-10
Supplement: nxab182_supplemental_file.pdf [file nxab182_supplemental_file.pdf]

Nguyen et al. (2021). Child linear growth during and after the first 1000 days is positively associated with intellectual functioning and mental health among school-age children in Vietnam  
Online supporting materials

**Supplemental Figure 1. Flow diagram of participant progress throughout the study (n=1,579 singleton live births)<sup>1, 2</sup>**

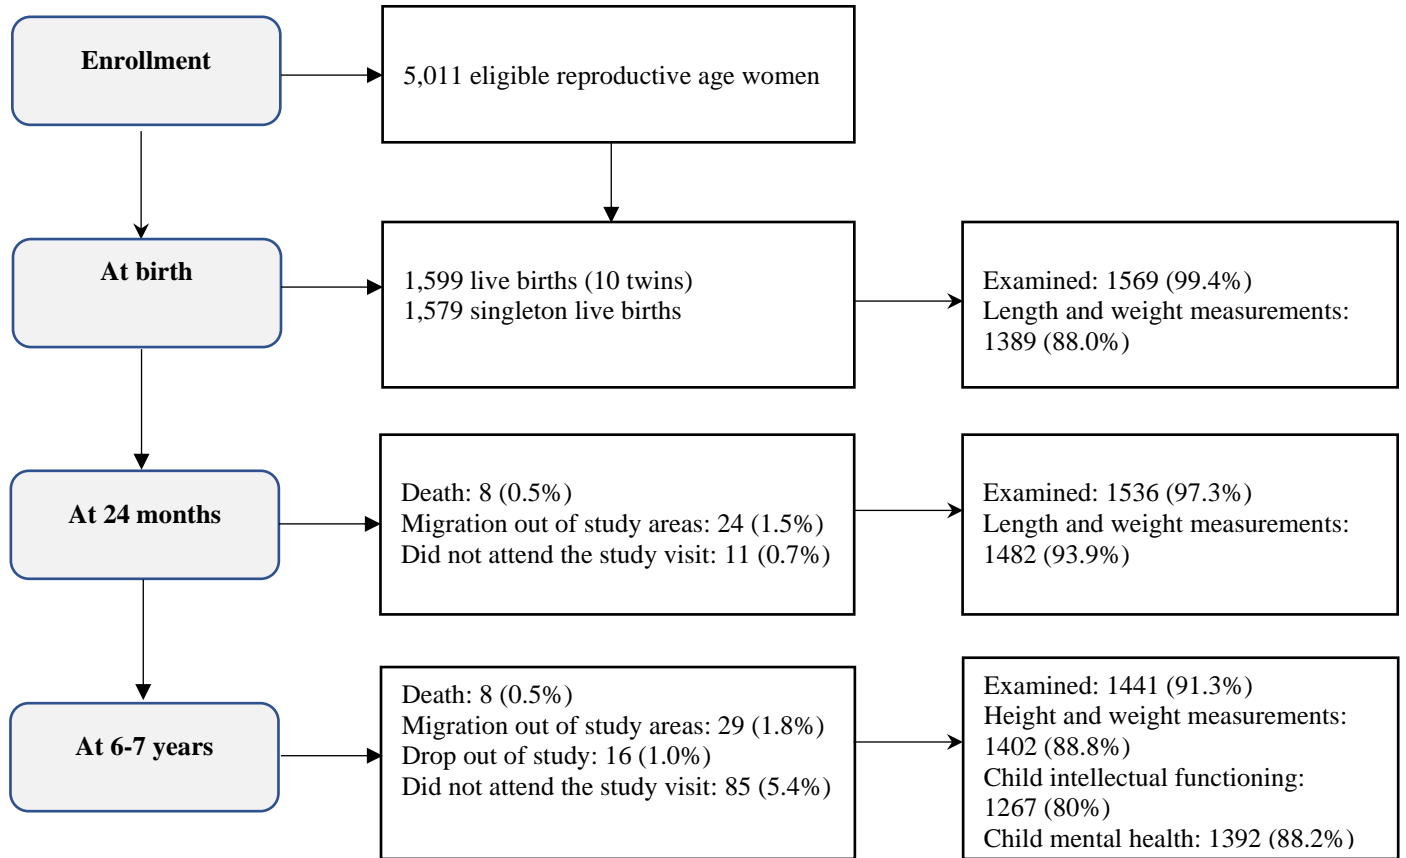

<sup>1</sup>Death and migration are cumulative. <sup>2</sup>All percentages were calculated using the total eligible birth sample (n=1579)

Nguyen et al. (2021). Child linear growth during and after the first 1000 days is positively associated with intellectual functioning and mental health among school-age children in Vietnam  
Online supporting materials

**Supplemental Table 1. Comparison of maternal and offspring characteristics between the final analytic sample and those missing outcome data at age 6-7 y<sup>1,2</sup>**

|                                              | Analytic Sample<br><i>n</i> = 1392 | Excluded<br><i>n</i> = 207 |
|----------------------------------------------|------------------------------------|----------------------------|
|                                              | Mean ± SD/ percent                 | Mean ± SD/ percent         |
| <b>Child characteristics</b>                 |                                    |                            |
| Child growth at 24 months                    |                                    |                            |
| Weight, <i>kg</i>                            | 9.8 ± 1.0                          | 9.6 ± 1.0                  |
| Length, <i>cm</i>                            | 78.0 ± 2.7                         | 77.5 ± 2.9                 |
| HAZ                                          | -1.1 ± 0.9                         | -1.2 ± 1.0                 |
| BMIZ                                         | -0.05 ± 0.8                        | -0.1 ± 0.8                 |
| Stunting, % <sup>2</sup>                     | 16.4                               | 23.3                       |
| Overweight/obese, %                          | 9.6                                | 8.8                        |
| Other child characteristics                  |                                    |                            |
| Female, %                                    | 49.5                               | 48.3                       |
| Gestational age, <i>w</i>                    | 39.2 ± 2.0                         | 39.1 ± 2.1                 |
| Preterm, %                                   | 9.6                                | 12.8                       |
| Low birth weight, %                          | 4.8                                | 4.7                        |
| SGA, %                                       | 15.3                               | 18.2                       |
| Exclusive breastfeeding at 3 months, %       | 59.5                               | 56.3                       |
| Dietary diversity score at 2y <sup>2</sup>   | 4.7 ± 1.2                          | 4.3 ± 1.4                  |
| <b>Maternal characteristics</b>              |                                    |                            |
| Age, <i>y</i>                                | 25.9 ± 4.3                         | 25.9 ± 4.4                 |
| Education, % <sup>2</sup>                    |                                    |                            |
| Primary school                               | 7.5                                | 13.8                       |
| Middle school                                | 55.3                               | 46.0                       |
| High school                                  | 25.6                               | 23.0                       |
| College or higher                            | 11.7                               | 17.2                       |
| Preconception anemia, %                      | 19.9                               | 19.8                       |
| Depressive symptom (CESD≥10), % <sup>2</sup> | 9.2                                | 14.4                       |
| Maternal IQ, <i>score</i>                    | 86.7 ± 16.9                        | 85.9 ± 16.9                |
| <b>Household characteristics</b>             |                                    |                            |
| Socio-economic status, %                     |                                    |                            |
| Low                                          | 33.3                               | 33.0                       |
| Average                                      | 33.9                               | 29.5                       |
| High                                         | 32.8                               | 37.6                       |
| Home environment at 1y, <i>score</i>         | 63.3 ± 8.2                         | 63.4 ± 9.2                 |

<sup>1</sup>Values are means ± SDs or percentages; <sup>2</sup>*P*<0.05 for comparisons between analytic sample and those excluded using Chi-square test for categorical variables and student T-test for continuous variables

BMIZ: Body-mass-index for-age z-score; CES-D: Center for Epidemiologic Studies Depression Scale; HAZ: Height-for-age Z-score; IQ: Intelligence Quotient; SGA: Small for gestational age.

Nguyen et al. (2021). Child linear growth during and after the first 1000 days is positively associated with intellectual functioning and mental health among school-age children in Vietnam  
 Online supporting materials

**Supplemental Table 2: Associations of child growth during the first 1000 days and beyond with child intellectual development and mental health at 6-7y (model considered growth velocity from birth to 2y)**

| Outcomes                     | FSIQ (n=1,267)      |                     | SDQ (n = 1,392)      |                     |
|------------------------------|---------------------|---------------------|----------------------|---------------------|
|                              | Model 1             | Model 2             | Model 1              | Model 2             |
|                              | $\beta$ (95% CI)    | $\beta$ (95% CI)    | $\beta$ (95% CI)     | $\beta$ (95% CI)    |
| Birth length Z-score         | -0.36 (-1.20, 0.48) | -0.17 (-1.14, 0.80) | -0.07 (-0.30, 0.16)  | -0.11 (-0.37, 0.15) |
| Conditional height gain 0-2y | 1.34 (0.57, 2.10)   | 0.96 (0.10, 1.81)   | -0.09 (-0.30, 0.11)  | -0.06 (-0.29, 0.16) |
| Conditional height gain 2-7y | 1.12 (0.31, 1.93)   | 0.90 (-0.01, 1.82)  | -0.27 (-0.48, -0.05) | -0.21 (-0.45, 0.03) |
| Birth weight Z-score         | 1.01 (0.03, 1.99)   | 0.57 (-0.54, 1.68)  | 0.17 (-0.09, 0.43)   | 0.19 (-0.09, 0.48)  |
| Conditional weight gain 0-2y | -0.21 (-0.96, 0.54) | -0.40 (-1.24, 0.45) | 0.18 (-0.02, 0.37)   | 0.13 (-0.09, 0.35)  |
| Conditional weight gain 2-7y | 0.00 (-0.72, 0.73)  | -0.11 (-0.94, 0.71) | -0.07 (-0.27, 0.12)  | -0.09 (-0.31, 0.13) |

Model 1 adjusted for child age and sex; Model 2 adjusted for maternal (age, parity, and education) and child factors (age, sex, and pre-school education), home environment at 1y and 6-7y, household socioeconomic status and treatment group.
